# Supplementary material
Source: PubMed Central journal article supplement (PMC3822904)
Supplement: NIHMS523732-supplement-Supplementary_Table.pdf [file NIHMS523732-supplement-Supplementary_Table.pdf]

**Supplemental Table 1.** Organic acids profiled by GC/MS. Acids in italics were not detected in any subject and were thus excluded from the statistical analysis.

**Organic Acids Analyzed**

|                                  |                            |                               |
|----------------------------------|----------------------------|-------------------------------|
| 2-Ethyl-3-hydroxypropionic       | 4-Hydroxybutyric           | Lactic                        |
| 2-Keto-3-methylvaleric           | 4-Hydroxycyclohexylacetic  | Malic                         |
| 2-Ketoadipic                     | <i>4-Hydroxyisovaleric</i> | Malonic                       |
| 2-Ketoglutaric                   | 4-Hydroxyphenylacetic      | Methylcitric                  |
| 2-Ketoisocaproic                 | 4-Hydroxyphenyllactic      | Methylmalonic                 |
| 2-Ketoisovaleric                 | 4-Hydroxyphenylpyruvic     | Methylsuccinic                |
| 2-Methyl-3-hydroxybutyric        | 5-Hydroxyhexanoic          | <i>Mevalonic</i>              |
| <i>2-Methyl-3-hydroxyvaleric</i> | 5-Oxoproline               | <i>Mevalonolactone</i>        |
| <i>2-Methylacetoacetic</i>       | Acetoacetic                | N-acetylaspatic               |
| <i>2-Methylbutyrylglycine</i>    | Aconitic                   | <i>N-acetyltyrosine</i>       |
| <i>2-Hydroxy-3-methylvaleric</i> | Adipic                     | Octanoic                      |
| 2-Hydroxyadipic                  | Azelaic                    | Orotic                        |
| 2-Hydroxybutyric                 | Benzoic                    | Oxalic                        |
| 2-Hydroxyglutaric                | <i>Butyrylglycine</i>      | Phenylacetic                  |
| <i>2-Hydroxyisocaproic</i>       | Citric                     | Phenyllactic                  |
| 2-Hydroxyisovaleric              | <i>Decanoic</i>            | <i>Phenylpropionylglycine</i> |
| 2-Hydroxyphenylacetic            | Ethylmalonic               | Phenylpyruvic                 |
| 3-Methyladipic                   | Fumaric                    | Pimelic                       |
| <i>3-Methylcrotonylglycine</i>   | Glutaconic                 | Propionylglycine              |
| 3-Methylglutaconic               | Glutaric                   | Pyruvic                       |
| 3-Methylglutaric                 | Glyceric                   | Sebacic                       |
| 3-Hydroxy-3-methylglutaric       | Glycolic                   | Suberic                       |
| 3-Hydroxyadipic                  | Glyoxilic                  | <i>Suberylglycine</i>         |
| 3-Hydroxybutyric                 | <i>Hexanoic</i>            | Succinic                      |
| 3-Hydroxydecanedioic             | Hexonylglycine             | <i>Succinylacetone</i>        |
| 3-Hydroxyglutaric                | Hippuric                   | <i>Thymine</i>                |
| 3-Hydroxyisobutyric              | <i>Homogenetic</i>         | <i>Tigylglycine</i>           |
| 3-Hydroxyisovaleric              | Homovanillic               | Uracil                        |
| <i>3-Hydroxyoctanoic</i>         | Isobutyrylglycine          | Vanillylmandelic              |
| 3-Hydroxypropionic               | Isocitric                  |                               |
| <i>3-Hydroxyvaleric</i>          | Isovalerylglycine          |                               |
